1           **Analysis of genomic DNA methylation and gene transcription modulation induced by**  
2                                                    ***DNMT3A* deficiency in HEK293 cells**

3   **Running title** *DNMT3A* deficiency induced gene modulations

4

5   Mengxiao Zhang<sup>1,#</sup>, Jiaxian Wang<sup>1,2,#</sup>, Qiuxiang Tian<sup>3,4</sup>, Lei Feng<sup>5</sup>, Hui Yang<sup>1</sup>, Nan Zhu<sup>6</sup>, Xingchen  
6                                                    Pan<sup>4</sup>, Jianwei Zhu<sup>1</sup>, Peng Chen<sup>3,4,\*</sup>, Huili Lu<sup>1,\*</sup>

7

8   <sup>1</sup> Engineering Research Center of Cell and Therapeutic Antibody, Ministry of Education, School of  
9   Pharmacy, Shanghai Jiao Tong University, Shanghai, China

10   <sup>2</sup> Department of Hematology, VU University Medical Center, Amsterdam, the Netherlands

11   <sup>3</sup> Key Laboratory of Pathobiology, Ministry of Education, Jilin University, Changchun, Jilin, China

12   <sup>4</sup> Department of Genetics, College of Basic Medical Sciences, Jilin University, Changchun, Jilin,  
13   China

14   <sup>5</sup> Instrumental Analysis Center, Shanghai Jiao Tong University, Shanghai, China

15   <sup>6</sup> Shanghai general hospital, School of Medicine, Shanghai Jiao Tong University, Shanghai, China

16

17   # These authors contributed equally to the work.

18   \* Corresponding authors:

19   Dr. Peng Chen, telephone: 86-21-34204631; Key Laboratory of Pathobiology, Ministry of Education,  
20   Jilin University, Changchun, Jilin 130021, China; email: [pchen@jlu.edu.cn](mailto:pchen@jlu.edu.cn)

21   or

22   Dr. Huili Lu, telephone: 86-21-34204631; Engineering Research Center of Cell and Therapeutic  
23   Antibody, Ministry of Education, School of Pharmacy, Shanghai Jiao Tong University, Shanghai  
24   200240, China; email: [roadeer@sjtu.edu.cn](mailto:roadeer@sjtu.edu.cn)

25

26

27 **Abstract**

28 DNA methylation is an important epigenetic modification associated with transcriptional repression,  
29 and plays key roles in normal cell growth as well as oncogenesis. Among the three main DNA  
30 methyltransferases (DNMT1, DNMT3A, and DNMT3B), DNMT3A mediates *de novo* DNA  
31 methylation with partial functional redundancy with DNMT3B. However, the general effects of  
32 DNMT3A and its downstream gene regulation profile are yet to be unveiled. In the present study,  
33 we used CRISPR/Cas9 technology to successfully create DNMT3A deficient human embryonic  
34 kidney cell line HEK293, with frameshift mutations in its catalytic domain. Our results showed that  
35 the cell growth slowed down in *DNMT3A* knockout cells. UPLC-MS analysis of DNMT3A  
36 deficient cells showed that the genome-level DNA methylation was reduced by 21.5% and led to an  
37 impairment of cell proliferation as well as a blockage of MAPK and PI3K-Akt pathways. Whole  
38 genome RNA-seq revealed that *DNMT3A* knockout up-regulated expression of genes and pathways  
39 related to cell metabolism but down-regulated those involved in ribosome function, which explained  
40 the inhibition of cell growth and related signal pathways. Further, bisulfite DNA treatment showed  
41 that *DNMT3A* ablation reduced the methylation level of *DNMT3B* gene as well, indicating the  
42 higher DNMT3B activity and thereby explaining those down-regulated profiles of genes.

43 **Keywords** DNMT3A, deficiency, CRISPR/Cas9, RNA-seq, methylation

44

## 45 1 INTRODUCTION

46 DNA methylation is an epigenetic modification with widespread effects on gene expression. High  
47 levels of promoter DNA methylation is usually associated with gene silencing (You & Jones, 2012).  
48 Abnormal DNA methylation is involved in the development of multiple malignancies, such as solid  
49 tumors and leukemia (Banaszak et al., 2018; Fan et al., 2010; Gao et al., 2013; Lee et al., 2005;  
50 Mirza et al., 2013; Montgomery et al., 2004; Yang et al., 2016). In vertebrates, cytosine methylation  
51 on CpG dinucleotides is the predominant form of methylation catalyzed by DNA methyltransferase  
52 1 (DNMT1) (Bestor, 1992) and established *de novo* by DNMT3A and DNMT3B (Okano et al.,  
53 1999; Okano et al., 1998).

54 To investigate the underlying mechanisms responsible for locus-specific or global methylation, *in*  
55 *vivo* and *in vitro* models of DNMTs deficiency have been developed (Huang et al., 2017). In mice,  
56 knockout of *DNMT1* or *DNMT3B* can cause early embryo death. In contrast, *DNMT3A* knockout  
57 mice can be born normally but develop developmental defects and die premature soon after birth  
58 (Okano et al., 1999). These observations highlight that DNMT3A plays specific roles in regulating  
59 chromatin methylation during the development after birth (Okano et al., 1999; Riggs & Xiong,  
60 2004). Similarly, in human embryonic cells, individual or simultaneous disruption of DNMT3A or  
61 DNMT3B resulted in viable, pluripotent cell lines, but deletion of DNMT1 resulted in rapid cell  
62 death (Liao et al., 2015). Banaszak et al. mutated DNMT3A in K562 leukemia cells and the derived  
63 cell lines showed impaired cell growth (Banaszak et al., 2018). Although almost all cells can  
64 survive DNMT3A mutation, reports have shown paradoxical hyper-methylation of genes, or no  
65 changes in global or regional DNA methylation patterns in response to DNMT3A knockdown  
66 (Banaszak et al., 2018; Challen et al., 2012). Hence, the exact roles of DNMT3A are yet to be  
67 elucidated.

68 CRISPR/Cas9 system is an efficient genome editing technique developed in recent years (Horvath  
69 & Barrangou, 2010). Comparing with the traditional knockout techniques, such as zinc finger  
70 nuclease technology (ZFN) and transcriptional activation effect factor nuclease technology  
71 (TALEN), CRISPR/Cas9 is comparatively easy to implement, is cost and time-effective, as well as  
72 has higher efficiency. CRISPR/Cas9 technique has been successfully used in human cells, zebrafish,  
73 mice, and bacterial genome modification (Le Cong et al., 2013; Mali et al., 2013). In the present  
74 study, we used CRISPR/Cas9 technology to establish a *DNMT3A* knockout cell line derived from  
75 HEK293T, a human embryonic kidney cell line. We performed detailed transcriptomic and  
76 epigenetic analyses, in addition to physiology measurements, to discover the impact of DNMT3A  
77 deficiency on cell proliferation and metabolism, as well as to identify genes which are potentially  
78 regulated by DNMT3A.

## 79 2 MATERIALS AND METHODS

## 80 **2.1 Cell culture and reagents**

81 Wild *type* HEK293 cells (HEK293T) were obtained from the Type Culture Collection of the Chinese  
82 Academy of Sciences (Shanghai, China) and detected to be negative for mycoplasma contamination  
83 using the Myco-Blue mycoplasma detector (Vazyme; Nanjing, Jiangsu, China). Cells were cultured  
84 in high glucose DMEM supplemented with 10% FBS, incubated at 37°C with 5% CO<sub>2</sub> in a  
85 humidified cell incubator (Thermo Fisher Scientific; OH, USA). The plasmid pX330 carrying  
86 CRISPR/Cas9 system was kindly provided by Dr. Feng Zhang (MIT) (L. Cong et al., 2013).  
87 Competent cells of the *E. coli* strains DH5 $\alpha$  were purchased from Microgene (Shanghai, China). All  
88 media and supplements were purchased from Gibco (Thermo Fisher Scientific; Waltham, MA,  
89 USA). Cell growth and viability were monitored with a cell counter (Countstar; Shanghai, China).

## 90 **2.2 SgRNA design and DNMT3A disruptive vector construction**

91 Two sgRNAs targeting exon 19 of *DNMT3A* (GeneBank ID 806904736) were designed using the  
92 web tool provided by Dr. Zhang's lab (<http://crispr.mit.edu>) as shown in **Fig. 1**. To construct the  
93 sgRNA plasmids, single strand primers were designed and synthesized as sgRNA1-forward:  
94 5'-CACCGCATGATGCGCGGCCCAAGG-3', sgRNA1-reverse  
95 5'-AAACCCTTGGGCCGCGCATCATGC-3', sgRNA2-forward  
96 5'-CACCGCTCACTAATGGCTTCTACCT-3' and sgRNA1-reverse  
97 5'-AAACAGGTAGAAGCCATTAGTGAGC-3'. Each pair of primers were annealed to generate  
98 double-stranded cDNA, phosphorylated by T4 polynucleotide kinase at the 5' ends (NEB, Ipswich,  
99 MA) at 37°C for 30 min, and further ligated into BbsI digested pX330 plasmids by T4 DNA ligase  
100 (Takara; Kusatsu, Shiga, Japan). The ligate was transformed to DH5 $\alpha$  competent cells for culture  
101 overnight. Then the grown clones were selected for sequencing to get the right constructed plasmids  
102 pX330-sgRNA1 and pX330-sgRNA2.

## 103 **2.3 Transfection of HEK293 cells**

104 HEK293 cells were seeded at 2 $\times$ 10<sup>5</sup> cells/well into 12-well plate one day prior to transfection.  
105 When reached 70-80% confluence, the cells were co-transfected with pX330-sgRNA1 and  
106 pX330-sgRNA2 at a molar ratio of 1:1, since it was reported that double sgRNAs could result in  
107 higher editing efficiency than single one (Zheng et al., 2014). The transfection was performed using  
108 Lipofectamine 2000 reagent (Invitrogen, CA, USA) according to manufacturer's instructions.

## 109 **2.4 DNMT3A knockout clones selection**

110 HEK293 cell pool transfected with pX330-sgRNAs were seeded into 96-well plates at the density of  
111 0.5 cell per well for limiting dilution. After about ten days' incubation, the plates were examined for  
112 single cell clones under microscope. When grew to about 80% confluent in the well, the clones

113 would be detached for subpopulation and the genomic DNA was extracted with *QuickExtract* DNA  
114 extraction solution (Epicenter; MD, USA) for PCR verification, using primers  
115 HEK293-DNMT3A-For (5'-GTACCATCCTGTCCCTCCAC-3') and HEK293-DNMT3A-Rev  
116 (5'-GGCTCAGGGTTAAACGGGGA-3'), which can amplify a 798 bp fragment for HEK293  
117 wild-type cells. By sequencing the amplified fragments, the clone with disrupted DNMT3A was  
118 selected and designated to be DNMT3A KO cell line.

## 119 **2.5 DNMT3A knockout cells proliferation curve**

120 DNMT3A KO and WT cells were cultured and seeded at  $3 \times 10^4$  cells/well into 12-well plate. Cells  
121 were counted every 24 h for consecutive 6 days. And cell proliferation curves were compared  
122 between the two cell lines.

## 123 **2.6 Western blot analysis**

124 *DNMT3A* KO and WT HEK293 cells of  $1 \times 10^6$  were washed with PBS, lysed using 100  $\mu$ L RAPA  
125 lysis buffer containing protease inhibitors cocktail (Roche; Penzberg, Germany), and separated by a  
126 10% SDS-PAGE. After transferring onto a 0.45  $\mu$ m PVDF membranes, immunoblotting was  
127 performed. For detection of DNMT3A deficiency, primary mouse monoclonal antibody against  
128 GAPDH (Sangon; Shanghai, China) and polyclonal rabbit-anti-human DNMT3A (Sangon) were  
129 used at 1:1000 dilution. For detection of MAPK and PI3K-Akt pathways, primary monoclonal  
130 antibodies against human Erk (137F5; Cell Signaling Technology; Danvers, MA, USA),  
131 phosphor-Erk (197G2; Cell Signaling Technology), JNK (D-2; Santa Cruz; Dallas, TX, USA),  
132 phosphor-JNK (G9; Cell Signaling Technology), Akt (11E7; Cell Signaling Technology), and  
133 phosphor-Akt (244F9; Cell Signaling Technology) were used. HRP-conjugated anti-mouse IgG or  
134 anti-rabbit IgG antibodies (Jackson ImmunoResearch; PA, USA) were used for secondary  
135 antibodies. Signals were detected with enhanced chemiluminescence (Millipore; MA, USA) and  
136 visualized with a gel imaging system (Tanon; Shanghai, China).

## 137 **2.7 Genome-wide DNA methylation analysis by UPLC-ESI-MS/MS**

138 Genomic DNA of cells were extracted by AxyPrep Kit (Axygen; Hangzhou, Zhejiang, China) and  
139 RNase A was added to remove RNA. Then the genomic DNA was hydrolyzed by DNase I at 37 °C  
140 for 1 h, denatured at 100 °C for 3 min, and immediately cooled down on ice for 10 min, then treated  
141 with *Nuclease* P1 at 37°C for 16 h, followed by treatment of alkaline phosphatase at 37 °C for 2 h.  
142 The nucleotides were stored at -20 °C before UPLC-ESI-MS-MS detection.

143 Acquity UPLC (Waters, USA) coupled with Triple Quad™ 5500 mass spectrometry (Sciex, USA)  
144 was used to quantitatively analyze  $m^5dC$  and  $dG$ . UPLC-ESI-MS/MS method was established to  
145 evaluate DNA methylation status of genome (Putra et al., 2014). Reference nucleotide standards of

146 A, G, T, C, dA, dG, dC, U and m<sup>5</sup>dC were purchased from Sigma (Sigma Aldrich, St. Louis, MO,  
147 USA) and dissolved in H<sub>2</sub>O to a final concentration of 1.0 mg/ml. UPLC and electronic spray were  
148 used to separate and detect the standards at multiple reaction monitoring (MRM) mode. The m<sup>5</sup>dC  
149 (m/z 241.9→126.3) and dG (m/z 268.1→152.3) were chosen as parent and child ion pairs for  
150 quantitative detection. The CE voltage of both m<sup>5</sup>dC and dG was 15 eV, and the DP voltage was 40  
151 V, respectively. Standard curves of m<sup>5</sup>dC and dG were first graphed and the level of cytosine  
152 methylation was calculated as (m<sup>5</sup>dC/dG) x 100%.

### 153 **2.8 RNA-seq to reveal transcriptional response to DNMT3A deficiency**

154 Total RNA was extracted from 10<sup>6</sup> of DNMT3A KO or WT cells. Oligo(dT) magnetic beads were  
155 used to enrich mRNA. CDNA was obtained using Illumina Truseq<sup>TM</sup> RNA sample prep Kit, and  
156 pair-end sequencing (insert size = 300 bp, read length = 150 bp) was performed according to the  
157 standard protocol of Novaseq 6000 (Illumina, CA, USA). Raw sequencing reads were filtered to  
158 include only high quality reads in downstream analysis: 1) clip adapter sequence from reads, and  
159 remove reads with no insertion; 2) clip 3' low quality bases (Phred quality < 20), and remove the  
160 whole read if there exists a single base with Phred quality < 10; 3) remove the reads that have more  
161 than 10% ambiguous bases (N); remove the reads that are shorter than 20 bp after clipping. The  
162 filtered reads were aligned to human transcriptome (build GRCh38) by TopHat (Trapnell et al.,  
163 2009). PCR duplicates were marked and ignored in downstream analysis. All the data were  
164 deposited into the open-access Genome Sequence Archive (gsa.big.ac.cn) under accession no.  
165 CRA002294.

166 The read count data of DNMT3A KO and WT cells was analyzed by Cufflink software to identify  
167 the differential gene expression induced by DNMT3A deficiency (Trapnell et al., 2012). We used  
168 FPKM (Fragments Per Kilobase of exon model per Million mapped reads) to estimate genes  
169 expression levels. False discovery rate (FDR) p values were calculated using the method proposed  
170 by Benjamini and Hochberg (1995) to correct for multiple testing. Differentially expressed genes in  
171 DNMT3A KO cells were identified by FDR p value ≤ 0.05 and absolute logarithm of fold change  
172 (log<sub>2</sub>FC) ≥ 2.

### 173 **2.9 KEGG pathway analysis of differentially expressed genes**

174 For the purpose of pathway enrichment analysis, we defined differential expression using a loose  
175 definition (FDR p value ≤ 0.05 and absolute log<sub>2</sub>FC ≥ 1). The Ensembl IDs of differentially  
176 expressed genes were analyzed by KOBAS (<http://kobas.cbi.pku.edu.cn>) for KEGG pathway  
177 enrichment. The pathways with FDR p value ≤ 0.05 were considered significantly differentially  
178 expressed.

### 179 **2.10 Bisulfite DNA analysis and quantitative PCR verification of DNMT3A regulated genes**

180 DNMT3A is responsible for the *de novo* methylation of multiple genes, and its mutation can lead to  
181 demethylation of promoter CpG and thus elevate gene expression at the transcript level, which  
182 further up-regulate or down-regulate related downstream genes indirectly. Therefore, from the gene  
183 pool which transcript level was interfered by DNMT3A knockout as determined by RNA-seq, we  
184 selected 3 representative genes to verify by bisulfite DNA analysis as well as quantitative PCR:  
185 RUNX1, IQGAP3, and DNMT3B. RUNX1 is known to be regulated by DNMT3A in  
186 hematopoietic carcinogenesis (Stengel et al., 2018). IQGAP3 is a scaffolding protein that is  
187 involved in cancer cells proliferation, and with no correlation with DNA methyltransferases  
188 reported before (Lin et al., 2019). All 3 genes were hot studied in malignancy development and  
189 helpful to understand the functions of DNMT3A.

190 DNA methylation status of selected genes were analyzed by bisulfite sequencing PCR (BSP).  
191 Genomic DNA was extracted with an Axygen Genomic DNA Miniprep Kit (San Francisco, CA,  
192 USA), and 0.5 µg of DNA was modified through bisulfite treatment using a Bisuldream® —  
193 Methylation Universal kit (Miozyme; Shanghai, China). Bisulfite-PCR of the genes promoter  
194 regions (**Table S1**) was performed using the following specific primers: RUNX1 forward: 5’-  
195 TTTTtaggTTTTAAAATATTTGTGAGTTGT-3’, RUNX1 reverse: 5’-  
196 CACCTACCCTCCCCAAACTATAC-3’, IQGAP3 forward: 5’-  
197 GTAGAAAAGGAGTTTGAAGGAATAAGA-3’, IQGAP3 reverse: 5’-  
198 ACTCACAACTACCCAACCTAAACC-3’, and DNMT3B forward 5’-  
199 TTAAGTAGGATGATAGGTAGGGGTAT-3’, DNMT3B reverse: 5’-  
200 CCCTAAAAATCAAAAACCTAAAC-3’. The amplified fragments were inserted into  
201 pMD19-T vectors (Takara; Tokyo, Japan), and 10-15 clones for each gene were selected for  
202 sequencing. The results were analyzed by a web-based quantification tool for methylation analysis  
203 (<http://quma.cdb.riken.jp>).

204 To detect the transcription levels of the above selected three genes, the DNMT3A KO and WT  
205 HEK293 cells were cultured and RNA samples were extracted using Direct-zol RNA kit (Zymo  
206 Research; Irvine, CA, USA). Then cDNA was synthesized according to the protocol of the RT-PCR  
207 kit (Takara; Kusatsu, Shiga, Japan) and used as templates for quantitative PCR. The primers were  
208 designed using Primer Premier 5.0 (Premier Biosoft; Palo Alto, CA, USA) according to published  
209 sequences (NCBI Accession number: D43967 for RUNX1, AB105103 for IQGAP3, AF156487 for  
210 DNMT3B and M33197 for GAPDH). The following sequences for primers were synthesized  
211 (Sangon Biotech; Shanghai, China) as RUNX1 forward: 5’ – TCTCTCCTCTATCTTCCA– 3’,  
212 RUNX1 reverse: 5’-GGTATGTGCTATCTGCTTA-3’; IQGAP3 forward:  
213 5’-GACCACTACCTAACTCAG-3’, IQGAP3 reverse 5’-GCATCATCAACAACCTTCTA-3’;  
214 DNMT3B forward: 5’- GGCAAGTTCTCCGAGGTCTCTG-3’, DNMT3B reverse:  
215 5’-TGGTACATGGCTTTTCGATAGGA-3’; and GAPDH forward:

216 5'-CTCTGGTAAAGTGGATATTGT-3', GAPDH reverse: 5'-  
217 GGTGGAATCATATTGGAACA-3'). The real-time PCR procedures were performed with 25  $\mu$ L  
218 PCR reaction systems including 12.5  $\mu$ L qPCR Mix (Toyobo; Osaka, Japan), 0.4  $\mu$ M of each primer,  
219 and 1  $\mu$ L template cDNA by thermocycler (StepOnePlus; ThermoFisher, USA). The delta-delta  
220 threshold cycle ( $\Delta\Delta C_T$ ) method was used to calculate relative copy numbers of targeted genes  
221 related to housekeeping gene *GAPDH*.

## 222 3 RESULTS

### 223 3.1 Generation of DNMT3A deficient clones of HEK293

224 Plasmids pX330-sgRNA1 and pX330-sgRNA2 were co-transfected into HEK293 cells. After  
225 limiting dilution, the grown clones were selected by PCR using the HEK293-DNMT3A-For and  
226 HEK293-DNMT3A-Rev verification primers. We identified one DNMT3A deficient clone from 17  
227 clones, which showed complete disruption of *DNMT3A* gene and designated it as DNMT3A KO  
228 (Figure 2A). Figure 2B shows 137 and 10 bp deletions in the KO A and KO B alleles respectively,  
229 leading to complete ablation of *DNMT3A* due to frameshift mutations. Next, we performed western  
230 blot to characterize the expression of DNMT3A in the DNMT3A KO clone. As shown in Figure  
231 2C, DNMT3A protein expression was completely abrogated in the selected clone, thereby  
232 confirming the successful ablation of DNMT3A.

### 233 3.2 DNMT3A deficiency resulted in genome-wide decrease in DNA methylation

234 DNMT3A is responsible for the DNA methylation of large number of genes in mammalian cells. To  
235 further verify the effect of *DNMT3A*, we performed UPLC-MS to quantify the global DNA  
236 methylation level changes following *DNMT3A* knockout. As described in Materials and Methods,  
237 we first characterized the peaks of standards A, G, T, C, dA, dG, dC, U, and m<sup>5</sup>dC, and then  
238 developed the linear curves of dG and m<sup>5</sup>dC (Figure S1). Genomic DNA were extracted from  
239 DNMT3A KO and WT cells and hydrolyzed to nucleotides for the measurement of dG and m<sup>5</sup>dC  
240 content. The percentage of m<sup>5</sup>dC/dG was calculated to represent the methylation level. As shown in  
241 Figure 3, the whole-genome DNA methylation level decreased significantly (by 21.5%) in  
242 *DNMT3A* KO cells ( $12.35 \pm 0.36\%$ ) than in WT cells ( $9.69 \pm 0.13\%$ ).

### 243 3.3 DNMT3A deficiency impaired cell growth

244 To evaluate the effect of DNMT3A deficiency on cell proliferation, growth profiles of *DNMT3A*  
245 KO and WT cells were evaluated as shown in Figure 4. The proliferation ability of HEK293 cells  
246 was significantly reduced in response to *DNMT3A* deficiency. After 6 days, the cell counts of  
247 *DNMT3A* KO cells reduced to only 40% of WT cells ( $0.77 \pm 0.15$ )  $\times 10^6$  vs ( $1.94 \pm 0.17$ )  $\times 10^6$



248 cells). Further, the doubling time was notably prolonged from  $0.99 \pm 0.28$  days for WT cells to  $1.53$   
249  $\pm 0.39$  days for *DNMT3A* KO cells.

### 250 **3.4 RNA-seq analysis**

251 After clipping and filtering, RNA-seq yielded sequencing data of 53.2 million reads (7.9 billion  
252 base pairs) and 54.8 million reads (8.2 billion base pairs) for *DNMT3A* KO and WT cells,  
253 respectively. It was equivalent to 264.8 and 273.5 times coverage of human transcriptome (30  
254 million base pairs in size). At least 98.4% of the bases had Phred quality  $> 20$  (error rate  $< 0.01\%$ ).  
255 TopHat mapped 94.0% of sequencing reads to human genome, including 3.4% reads mapped to  
256 multiple genomic position which were excluded from the expression analysis.

### 257 **3.5 Differentially expressed genes and pathways**

258 At significant level of FDR p value  $\leq 0.05$  and with absolute  $\log_2FC \geq 2$ , we identified 51  
259 differentially expressed genes (**Figure 5**). Among them, more genes were down-regulated ( $N = 34$ )  
260 as compared to up-regulated genes ( $N = 17$ ). The top 10 differentially methylated genes are listed in  
261 Table 1 (FDR p value  $\leq 2.46 \times 10^{-42}$ ). The pathway enrichment analysis was performed for 815  
262 up-regulated and 658 down-regulated Ensembl IDs (FDR p value  $\leq 0.01$  and absolute fold change  $\geq$   
263 1.5). Pathways related to calcium signaling, ECM-receptor interaction, and Hippo signaling, were  
264 up-regulated (**Table 2**), while pathways including Ribosome biogenesis and cysteine and  
265 methionine metabolism were down-regulated (FDR p value  $\leq 0.01$ , **Table 3**).

### 266 **3.6 Methylation status and transcript level of representative genes regulated by DNMT3A** 267 **deficiency**

268 According to the results of RNA-seq, there were many up- or down-regulated genes (**Figure 5**),  
269 indicating the alteration in methylation profiles caused by DNMT3A deficiency. Since both  
270 DNMT3A and DNMT3B are responsible for *de novo* DNA methylation together, the RNA-seq  
271 signal of DNMT3B was determined. We observed a 1.31-fold increase in the RNA-seq signal of  
272 DNMT3B in *DNMT3A* KO cells compared to that in WT, indicating the possible compensatory  
273 effect of DNMT3B at the deficiency of DNMT3A. Up-regulation of DNMT3B may result in the  
274 methylation of some genes and the reduction of their transcription, which explains why the  
275 transcription levels of some genes were reduced in this study.

276 The promoter methylation levels and mRNA transcription levels of *DNMT3B* and two  
277 representative tumorigenesis-related genes, *RUNXI* and *IQGAP3*, were verified. The CpG  
278 island-rich promoter region (from -1.0 to 0 kb relative to the transcription start site) was analyzed  
279 by BSP for each of the three genes. According to the results shown in **Figure 6**, DNMT3A  
280 deficiency did reduce the DNA methylation level of *RUNXI* promoter (**Figure 6A**), but it induced

281 the methylation of *IQGAP3* promoter (**Figure 6B**); this induction of methylation was possibly  
282 caused by *DNMT3B*, which showed reduced DNA methylation in its promoter region (**Figure 6C**).  
283 Quantitative PCR results confirmed the methylation regulation results. Transcription of *RUNX1* was  
284 up-regulated by 80%, and that of *IQGAP3* was reduced by 46%. The transcription of *DNMT3B* was  
285 also elevated in *DNMT3A* KO cells, but only by 15% (**Figure 6D**). This is the first report to show  
286 that DNMT3A contributes to the methylation of the *DNMT3B* gene, indicating the cross-activity of  
287 the two *de novo* DNA methyltransferases.

#### 288 **4 DISCUSSION**

289 In recent years, DNMT3A has been intensely studied for its role in tumor prognosis or therapy (Gao  
290 et al., 2015; Yang et al., 2016). To better reveal the functions of DNMT3A in cancer occurrence and  
291 development, in this study, we mutated HEK293 cells using the CRISPR/Cas9 technology and  
292 successfully created a *DNMT3A* knockout cell line, with homozygous frameshift deletion in both  
293 alleles. LC-MS analysis showed that knockout of *DNMT3A* induced a 21.5% reduction of global  
294 DNA methylation. The reserved DNA methylation could be attributed to the functions of DNMT1  
295 and DNMT3B (Liao et al., 2015). In addition, we attempted the mutation of *DNMT1* or *DNMT3B*  
296 using the same strategy in HEK293 cells, but no single clone with the required gene mutation or  
297 deficiency was accessed, or the selected clones were unstable for long-term culture (data not  
298 shown).

299 Several previous studies have focused on *DNMT3A* gene knockout in human or mouse-resourced  
300 cells, including human embryonic stem cells, human leukemia cells K562, mouse hematopoietic  
301 stem cells, as well as mouse somatic cells (Banaszak et al., 2018; Hatazawa et al., 2018; Jeong et al.,  
302 2018; Liao et al., 2015). Compared to mouse cells, human cells are less tolerant to DNMT3A  
303 deficiency and it can cause lethality and genomic instability in the cells. The results of these  
304 previous studies were consistent with our observations that DNMT3A deficiency suppresses  
305 HEK293 cell activity. The doubling time of cells dropped from  $0.99 \pm 0.28$  days to  $1.53 \pm 0.39$  days;  
306 this result was similar to the phenomenon of impaired cell growth caused by the *DNMT3A* mutation  
307 in K562 cells (Banaszak et al., 2018). We assume that this effect is associated with the MAPK or  
308 PI3K-Akt pathways, which predominantly contribute to cell proliferation and migration. In this study,  
309 we also observed inhibition of the Erk, JNK, and Akt signaling pathways (**Fig. 7**).

310 A previous study introduced frameshift mutations at exons 2 and 3, ablating DNMT3A from more  
311 upstream regulatory region (Banaszak et al., 2018). However, in our study, the *DNMT3A* mutation  
312 was targeted at exon 19 in the catalytic domain. Reduced genome-wide DNA methylation level in  
313 *DNMT3A* KO cells was expected to result in higher transcription levels. However, we unexpectedly  
314 observed that a high number of genes were down-regulated in our significant differential expression  
315 spectrum with FDR p value  $\leq 0.05$  and fold change  $\geq 2$  (binomial p value =  $7.6 \times 10^{-3}$ ). We also

316 found that the top 10 genes in the most significant gene cluster were down-regulated. DNMT3B  
317 showed abnormal up-regulation upon DNMT3A deficiency (**Fig. 6**), and possibly had a methylation  
318 function on some of the genes. However, a new research indicates that two SU(VAR)3-9 homologs,  
319 the transcriptional anti-silencing factor SUVH1, and SUVH3, as the methyl reader candidates, are  
320 associated with euchromatic methylation *in vivo* (Du et al., 2014). In plant, yeast, and mammalian  
321 cells, ectopic recruitment of DNAI1 was shown to enhance gene transcription (Harris et al., 2018).  
322 Therefore, the SUVH proteins bind to methylated DNA and recruit DNAJ proteins to enhance  
323 proximal gene expression, counteracting the repressive effects of transposon insertion near genes [42].  
324 The top 10 differently expressed genes were likely associated with the SUVH1 and SUVH3 factors  
325 when methylation was decreased. However, the real reason for the down-regulation of the top 10  
326 genes in this study is still unknown.

327 Further investigation of the regulated pathways helped us in understanding that the lower growth  
328 rate is a consequence of DNMT3A deficiency. The calcium signaling pathway and ECM-receptor  
329 interaction, which are genetically associated with the progression and recurrence of atrial fibrillation  
330 (Buttner et al., 2018), and the Hippo signaling pathway were up-regulated in *DNMT3A* KO cells  
331 (FDR p values were 0.002449, 0.004114, and 0.03080, respectively). Twist2 is known to regulate  
332 ITGA6 and CD44 expression in the ECM-receptor interaction pathway to promote kidney cancer  
333 cell proliferation and invasion (Zhang et al., 2016). The major functions of the Hippo pathway are  
334 the restriction of tissue growth in adults and modulation of cell proliferation, differentiation, and  
335 migration in developing organs (Meng et al., 2016). Cysteine and methionine metabolism are  
336 strictly indispensable to the proliferation of porcine adipogenic precursor cells. After commitment,  
337 Met deficiency in media has also been shown to affect the differentiation into adipocytes and alter  
338 lipid accumulation (Castellano et al., 2017).

339 In recent years, DNMT3A has been identified to be an ideal target for the development of  
340 personalized treatment or predict tumor prognosis (Gao et al., 2015). This is the first report on the  
341 effect of DNMT3A disruption in its catalytic domain on genomic DNA methylation and expression.  
342 The genes revealed by RNA-seq to be tightly regulated by DNMT3A in HEK293 cells, in this study,  
343 are of great significance to understand the functions of DNMT3A in the origin and development of  
344 tumors, and are potential novel targets for future cancer therapy.

#### 345 **ACKNOWLEDGEMENT**

346 This work was funded by the Science and Technology Commission of Shanghai Municipality (No.  
347 17431904500 to Lu H).

#### 348 **CONFLICT OF INTEREST**

349 The authors declare that they have no conflict of interest.

#### 350 **ETHICAL APPROVAL**

351 This article does not contain any studies with human participants or animals performed by any of the  
352 authors.

## 353 REFERENCES

- 354 Banaszak, L. G., Giudice, V., Zhao, X., Wu, Z., Gao, S., Hosokawa, K., Keyvanfar, K., Townsley, D. M.,  
355 Gutierrez-Rodrigues, F., Fernandez Ibanez, M. D. P., Kajigaya, S., & Young, N. S. (2018, Mar).  
356 Abnormal RNA splicing and genomic instability after induction of DNMT3A mutations by  
357 CRISPR/Cas9 gene editing. *Blood Cells Mol Dis*, 69, 10-22.
- 358
- 359 Bestor, T. H. (1992, Jul). Activation of mammalian DNA methyltransferase by cleavage of a Zn binding  
360 regulatory domain. *EMBO J*, 11(7), 2611-2617.
- 361
- 362 Buttner, P., Ueberham, L., Shoemaker, M. B., Roden, D. M., Dinov, B., Hindricks, G., Bollmann, A., & Husser, D.  
363 (2018). Identification of Central Regulators of Calcium Signaling and ECM-Receptor Interaction  
364 Genetically Associated With the Progression and Recurrence of Atrial Fibrillation. *Front Genet*, 9, 162.
- 365
- 366 Castellano, R., Perruchot, M. H., Tesseraud, S., Metayer-Coustard, S., Baeza, E., Mercier, Y., & Gondret, F. (2017,  
367 Feb). Methionine and cysteine deficiencies altered proliferation rate and time-course differentiation of  
368 porcine preadipose cells. *Amino Acids*, 49(2), 355-366.
- 369
- 370 Challen, G. A., Sun, D. Q., Jeong, M., Luo, M., Jelinek, J., Berg, J. S., Bock, C., Vasanthakumar, A., Gu, H. C., Xi, Y.  
371 X., Liang, S. D., Lu, Y., Darlington, G. J., Meissner, A., Issa, J. P. J., Godley, L. A., Li, W., & Goodell, M.  
372 A. (2012, Jan). Dnmt3a is essential for hematopoietic stem cell differentiation. *Nature Genetics*, 44(1),  
373 23-U43.
- 374
- 375 Cong, L., Ran, F. A., Cox, D., Lin, S., Barretto, R., Habib, N., Hsu, P. D., Wu, X., Jiang, W., & Marraffini, L. A.  
376 (2013). Multiplex genome engineering using CRISPR/Cas systems. *Science*, 339(6121), 819-823.
- 377
- 378 Cong, L., Ran, F. A., Cox, D., Lin, S. L., Barretto, R., Habib, N., Hsu, P. D., Wu, X. B., Jiang, W. Y., Marraffini, L.  
379 A., & Zhang, F. (2013, Feb 15). Multiplex Genome Engineering Using CRISPR/Cas Systems. *Science*,  
380 339(6121), 819-823.
- 381
- 382 Du, J., Johnson, L. M., Groth, M., Feng, S., Hale, C. J., Li, S., Vashisht, A. A., Wohlschlegel, J. A., Patel, D. J., &  
383 Jacobsen, S. E. (2014, Aug 7). Mechanism of DNA methylation-directed histone methylation by  
384 KRYPTONITE. *Mol Cell*, 55(3), 495-504.
- 385
- 386 Fan, H., Liu, D. S., Qiu, X. M., Qiao, F. C., Wu, Q. X., Su, X. W., Zhang, F., Song, Y. W., Zhao, Z. J., & Xie, W.  
387 (2010, Feb 3). A functional polymorphism in the DNA methyltransferase-3A promoter modifies the  
388 susceptibility in gastric cancer but not in esophageal carcinoma. *Bmc Medicine*, 8.
- 389

- 390 Gao, J., Wang, L. H., Xu, J. K., Zheng, J. M., Man, X. H., Wu, H. Y., Jin, J., Wang, K. X., Xiao, H. S., Li, S. D., & Li,  
391 Z. S. (2013, Nov 5). Aberrant DNA methyltransferase expression in pancreatic ductal adenocarcinoma  
392 development and progression. *Journal of Experimental & Clinical Cancer Research*, 32.  
393
- 394 Gao, X. N., Yan, F., Lin, J., Gao, L., Lu, X. L., Wei, S. C., Shen, N., Pang, J. X., Ning, Q. Y., Komeno, Y., Deng, A. L.,  
395 Xu, Y. H., Shi, J. L., Li, Y. H., Zhang, D. E., Nervi, C., Liu, S. J., & Yu, L. (2015, Aug). AML1/ETO  
396 cooperates with HIF1alpha to promote leukemogenesis through DNMT3a transactivation. *Leukemia*,  
397 29(8), 1730-1740.  
398
- 399 Harris, C. J., Scheibe, M., Wongpalee, S. P., Liu, W., Cornett, E. M., Vaughan, R. M., Li, X., Chen, W., Xue, Y.,  
400 Zhong, Z., Yen, L., Barshop, W. D., Rayatpisheh, S., Gallego-Bartolome, J., Groth, M., Wang, Z.,  
401 Wohlschlegel, J. A., Du, J., Rothbart, S. B., Butter, F., & Jacobsen, S. E. (2018, Dec 7). A DNA  
402 methylation reader complex that enhances gene transcription. *Science*, 362(6419), 1182-1186.  
403
- 404 Hatazawa, Y., Ono, Y., Hirose, Y., Kanai, S., Fujii, N. L., Machida, S., Nishino, I., Shimizu, T., Okano, M., Kamei,  
405 Y., & Ogawa, Y. (2018, Mar). Reduced Dnmt3a increases Gdf5 expression with suppressed satellite cell  
406 differentiation and impaired skeletal muscle regeneration. *FASEB J*, 32(3), 1452-1467.  
407
- 408 Horvath, P., & Barrangou, R. (2010). CRISPR/Cas, the immune system of bacteria and archaea. *Science*, 327(5962),  
409 167-170.  
410
- 411 Huang, Y. H., Su, J., Lei, Y., Brunetti, L., Gundry, M. C., Zhang, X., Jeong, M., Li, W., & Goodell, M. A. (2017, Sep  
412 18). DNA epigenome editing using CRISPR-Cas SunTag-directed DNMT3A. *Genome Biol*, 18(1), 176.  
413
- 414 Jeong, M., Park, H. J., Celik, H., Ostrander, E. L., Reyes, J. M., Guzman, A., Rodriguez, B., Lei, Y., Lee, Y., Ding,  
415 L., Guryanova, O. A., Li, W., Goodell, M. A., & Challen, G. A. (2018, Apr 3). Loss of Dnmt3a  
416 immortalizes Hematopoietic Stem Cells In Vivo. *Cell Rep*, 23(1), 1-10.  
417
- 418 Lee, S. J., Jeon, H. S., Jang, J. S., Park, S. H., Lee, G. Y., Lee, B. H., Kim, C. H., Kang, Y. M., Lee, W. K., Kam, S.,  
419 Park, R. W., Kim, I. S., Cho, Y. L., Jung, T. H., & Park, J. Y. (2005, Feb). DNMT3B polymorphisms and  
420 risk of primary lung cancer. *Carcinogenesis*, 26(2), 403-409.  
421
- 422 Liao, J., Karnik, R., Gu, H., Ziller, M. J., Clement, K., Tsankov, A. M., Akopian, V., Gifford, C. A., Donaghey, J.,  
423 Galonska, C., Pop, R., Reyon, D., Tsai, S. Q., Mallard, W., Joung, J. K., Rinn, J. L., Gnirke, A., &  
424 Meissner, A. (2015, May). Targeted disruption of DNMT1, DNMT3A and DNMT3B in human  
425 embryonic stem cells. *Nature Genetics*, 47(5), 469-478.  
426
- 427 Lin, M., Liu, Y., Ding, X., Ke, Q., Shi, J., Ma, Z., Gu, H., Wang, H., Zhang, C., Yang, C., Fang, Z., Zhou, L., & Ye,  
428 M. (2019). E2F1 transactivates IQGAP3 and promotes proliferation of hepatocellular carcinoma cells  
429 through IQGAP3-mediated PKC-alpha activation. *Am J Cancer Res*, 9(2), 285-299.  
430
- 431 Mali, P., Yang, L., Esvelt, K. M., Aach, J., Guell, M., DiCarlo, J. E., Norville, J. E., & Church, G. M. (2013).  
432 RNA-guided human genome engineering via Cas9. *Science*, 339(6121), 823-826.  
433

- 434 Meng, Z., Moroishi, T., & Guan, K. L. (2016, Jan 1). Mechanisms of Hippo pathway regulation. *Genes Dev*, 30(1),  
435 1-17.
- 436
- 437 Mirza, S., Sharma, G., Parshad, R., Gupta, S. D., Pandya, P., & Ralhan, R. (2013, Mar). Expression of DNA  
438 Methyltransferases in Breast Cancer Patients and to Analyze the Effect of Natural Compounds on  
439 DNA Methyltransferases and Associated Proteins. *Journal of Breast Cancer*, 16(1), 23-31.
- 440
- 441 Montgomery, K. G., Liu, M. C., Eccles, D. M., & Campbell, I. G. (2004). The DNMT3B C->T promoter  
442 polymorphism and risk of breast cancer in a British population: a case-control study. *Breast Cancer Res*,  
443 6(4), R390-394.
- 444
- 445 Okano, M., Bell, D. W., Haber, D. A., & Li, E. (1999, Oct 29). DNA methyltransferases Dnmt3a and Dnmt3b are  
446 essential for de novo methylation and mammalian development. *Cell*, 99(3), 247-257.
- 447
- 448 Okano, M., Xie, S., & Li, E. (1998). Cloning and characterization of a family of novel mammalian DNA  
449 (cytosine-5) methyltransferases. *Nature Genetics*, 19(3), 219-220.
- 450
- 451 Putra, S. E. D., Neuber, C., Reichetzeder, C., Hocher, B., & Kleuser, B. (2014). Analysis of Genomic DNA  
452 Methylation Levels in Human Placenta using Liquid Chromatography-Electrospray Ionization  
453 Tandem Mass Spectrometry. *Cellular Physiology and Biochemistry*, 33(4), 945-952.
- 454
- 455 Riggs, A. D., & Xiong, Z. (2004, Jan 6). Methylation and epigenetic fidelity. *Proc Natl Acad Sci U S A*, 101(1), 4-5.
- 456
- 457 Stengel, A., Kern, W., Meggendorfer, M., Nadarajah, N., Perglerova, K., Haferlach, T., & Haferlach, C. (2018,  
458 Feb). Number of RUNX1 mutations, wild-type allele loss and additional mutations impact on  
459 prognosis in adult RUNX1-mutated AML. *Leukemia*, 32(2), 295-302.
- 460
- 461 Trapnell, C., Pachter, L., & Salzberg, S. L. (2009, May 1). TopHat: discovering splice junctions with RNA-Seq.  
462 *Bioinformatics*, 25(9), 1105-1111.
- 463
- 464 Trapnell, C., Roberts, A., Goff, L., Pertea, G., Kim, D., Kelley, D. R., Pimentel, H., Salzberg, S. L., Rinn, J. L., &  
465 Pachter, L. (2012, Mar 1). Differential gene and transcript expression analysis of RNA-seq experiments  
466 with TopHat and Cufflinks. *Nat Protoc*, 7(3), 562-578.
- 467
- 468 Yang, S. M., Huang, C. Y., Shiue, H. S., Pu, Y. S., Hsieh, Y. H., Chen, W. J., Lin, Y. C., & Hsueh, Y. M. (2016, Aug  
469 15). Combined effects of DNA methyltransferase 1 and 3A polymorphisms and urinary total arsenic  
470 levels on the risk for clear cell renal cell carcinoma. *Toxicol Appl Pharmacol*, 305, 103-110.
- 471
- 472 You, J. S., & Jones, P. A. (2012, Jul 10). Cancer genetics and epigenetics: two sides of the same coin? *Cancer Cell*,  
473 22(1), 9-20.
- 474
- 475 Zhang, H. J., Tao, J., Sheng, L., Hu, X., Rong, R. M., Xu, M., & Zhu, T. Y. (2016). Twist2 promotes kidney cancer  
476 cell proliferation and invasion by regulating ITGA6 and CD44 expression in the ECM-receptor  
477 interaction pathway. *Onco Targets Ther*, 9, 1801-1812.

478

479 Zheng, Q., Cai, X., Tan, M. H., Schaffert, S., Arnold, C. P., Gong, X., Chen, C. Z., & Huang, S. (2014). Precise gene  
480 deletion and replacement using the CRISPR/Cas9 system in human cells. *Biotechniques*, 57(3), 115-124.

481

482

483

484

485

**Table 1.** Highly differentially expressed genes

| Gene ID         | Gene Name | FC     | log2FC | p-value   | p-adjust  | regulate |
|-----------------|-----------|--------|--------|-----------|-----------|----------|
| ENSG00000128591 | FLNC      | 0.0363 | -4.78  | 2.17E-175 | 4.00E-171 | down     |
| ENSG00000161671 | EMC10     | 0.009  | -6.79  | 4.81E-164 | 4.44E-160 | down     |
| ENSG00000019549 | SNAI2     | 0.0632 | -3.98  | 1.35E-97  | 8.32E-94  | down     |
| ENSG00000165512 | ZNF22     | 0.0252 | -5.31  | 1.58E-95  | 7.31E-92  | down     |
| ENSG00000184368 | MAP7D2    | 0.0452 | -4.47  | 1.99E-80  | 7.35E-77  | down     |
| ENSG00000173530 | TNFRSF10D | 0.033  | -4.92  | 2.00E-72  | 6.15E-69  | down     |
| ENSG00000164853 | UNCX      | 0.0516 | -4.27  | 9.81E-70  | 2.58E-66  | down     |
| ENSG00000121413 | ZSCAN18   | 0.0452 | -4.47  | 3.45E-51  | 7.95E-48  | down     |
| ENSG00000148798 | INA       | 0.0868 | -3.53  | 1.22E-48  | 2.51E-45  | down     |
| ENSG00000131435 | PDLIM4    | 0.0543 | -4.20  | 1.34E-45  | 2.46E-42  | down     |

486

487

488

489

490

491

**Note:** Gene ID: Ensembl IDs. FC: The fold change of the two samples, and wild type is the control. Log2FC: The base is the base 2 logarithm of the difference between the two samples, and wild type is the control. p-value: The difference in test results of the gene in two samples. p-adjust: Checked result for p-value. Regulate: To indicate whether the expression of the gene is down-regulated or up-regulated; “down” in the column indicates down-regulation of gene expression.



492

493

**Table 2.** Enrichment analysis of up-regulated pathways

| Database     | ID       | Term                             | p-value  | p-adjusted |
|--------------|----------|----------------------------------|----------|------------|
| KEGG Pathway | hsa05416 | Viral myocarditis                | 9.17E-06 | 0.002449   |
| KEGG Pathway | hsa04020 | Calcium signaling pathway        | 9.92E-06 | 0.002449   |
| KEGG Pathway | hsa04512 | ECM-receptor interaction         | 3.29E-05 | 0.004115   |
| KEGG Pathway | hsa04142 | Lysosome                         | 8.43E-05 | 0.006504   |
| KEGG Pathway | hsa04614 | Renin-angiotensin system         | 0.000512 | 0.01489    |
| KEGG Pathway | hsa05410 | Hypertrophic cardiomyopathy      | 0.000845 | 0.01988    |
| KEGG Pathway | hsa04974 | Protein digestion and absorption | 0.001509 | 0.030804   |
| KEGG Pathway | hsa04392 | Hippo signaling pathway          | 0.001559 | 0.030804   |
|              |          | -multiple species                |          |            |
| KEGG Pathway | hsa04360 | Axon guidance                    | 0.002453 | 0.04179    |
| KEGG Pathway | hsa05231 | Choline metabolism in cancer     | 0.002919 | 0.048069   |

494

495

496

497

498

499

**Note:** Term: KEGG pathway name. Database: the KEGG database contains two sub-libraries, one is KEGG PATHWAY and the other is KEGG DISEASE. ID: KEGG pathway ID. The uncorrected p-value is provided in the column with the heading 'p-value'; the smaller the p-value, the difference is statistically more significant, and a p-value of less than 0.05 is considered to indicate significant enrichment. p-adjust: The corrected p-value.

500

501

**Table 3.** Enrichment analysis of down-regulated pathways

| Database     | ID       | Term                               | p-value | p-adjust |
|--------------|----------|------------------------------------|---------|----------|
| KEGG Pathway | hsa03008 | Ribosome biogenesis in eukaryotes  | 9.9E-07 | 0.0005   |
| KEGG Pathway | hsa00270 | Cysteine and methionine metabolism | 7.4E-05 | 0.0103   |
| KEGG Pathway | hsa05205 | Proteoglycans in cancer            | 0.00097 | 0.0854   |
| KEGG Pathway | hsa00670 | One carbon pool by folate          | 0.00104 | 0.0854   |
| KEGG Pathway | hsa00230 | Purine metabolism                  | 0.00258 | 0.1621   |
| KEGG Pathway | hsa05169 | Epstein-Barr virus infection       | 0.0027  | 0.1621   |
| KEGG Pathway | hsa03010 | Ribosome                           | 0.00313 | 0.1621   |

502

503

504

505

506

**Note:** Term: KEGG pathway name. Database: the KEGG database contains two sub-libraries, one is KEGG PATHWAY and the other is KEGG DISEASE. ID: KEGG pathway ID. The uncorrected p-value is provided in the column with the heading 'p-value'; the smaller the p-value, the difference is statistically more significant, and a p-value of less than 0.05 is indicate significant enrichment. p-adjust: The corrected p-value.

507

508

509

510 **Figure 1** Location and design of sgRNAs. The sgRNA sequences are shown in blue, and protospacer  
511 adjacent motif (PAM) bases are in red.

512 **Figure 2** Verification of DNMT3A knockout clone. (A) PCR identification of DNMT3A knockout.  
513 Lane M: Trans 2K DNA ladder. (B) Sanger sequencing results of PCR amplicons. KO A and KO B  
514 represent the two alleles of *DNMT3A* gene of DNMT3A KO cells. Blue bases: sgRNA sequences; Red  
515 bases: PAM. (C) Detection of DNMT3A protein expression with western blot. WT: wild type control,  
516 KO: DNMT3A KO cells.

517 **Figure 3** Comparison of methylation level of genomic DNA of wild type (WT) and *DNMT3A* knockout  
518 (KO) HEK293 cells. The methylation level of genomic DNA decreased by 21.5% due to DNMT3A  
519 deficiency. \*\* $p < 0.01$  by two tailed students' t-test.

520 **Figure 4** DNMT3A deficiency impaired cell growth. WT: wild type cells; KO: *DNMT3A* KO cells.

521 **Figure 5** The significance and fold change of differential gene expression induced by *DNMT3A*  
522 deficiency. Each dot represents a gene; the significantly differentially expressed genes (FDR  $p$  value  $\leq$   
523 0.05 and fold change  $\geq 2$ ) are shown in red; the blue dots are top 10 differentially expressed genes (FDR  
524  $p$  value  $\leq 2.46 \times 10^{-42}$ ).

525 **Figure 6** DNA methylation levels and quantitative PCR evaluation of the three representative genes,  
526 *RUNX1*, *IQGAP3*, and *DNMT3B*, regulated by DNMT3A deficiency. Bisulfite analysis showed that, in  
527 comparison with WT cells, the promoter methylation level of *RUNX1* is decreased by DNMT3A  
528 deficiency (A), while the *IQGAP3* promoter has more methylated CpG islands in *DNMT3A* KO cells (B).  
529 *DNMT3B* promoter methylation is also regulated by DNMT3A and decreases upon its deficiency (C). (D)  
530 Quantitative PCR was performed in triplicate for mRNA expression profiles. In comparison with the  
531 relative transcription levels (to *GAPDH* level) in WT cells, *RUNX1* transcription levels were  
532 significantly up-regulated by 80%, *IQGAP3* transcription levels were reduced by 46%, and *DNMT3B*  
533 transcription levels were up-regulated by about 15%. \*\* $p < 0.01$  by two tailed students' t-test.

534 **Figure 7** DNMT3A deficiency suppressed MAPK and PI3K-Akt pathways. Total proteins as well as  
535 phosphorylated fractions of Erk, JNK, and Akt were detected with  $\beta$ -actin as the housekeeping control.

Figure 1

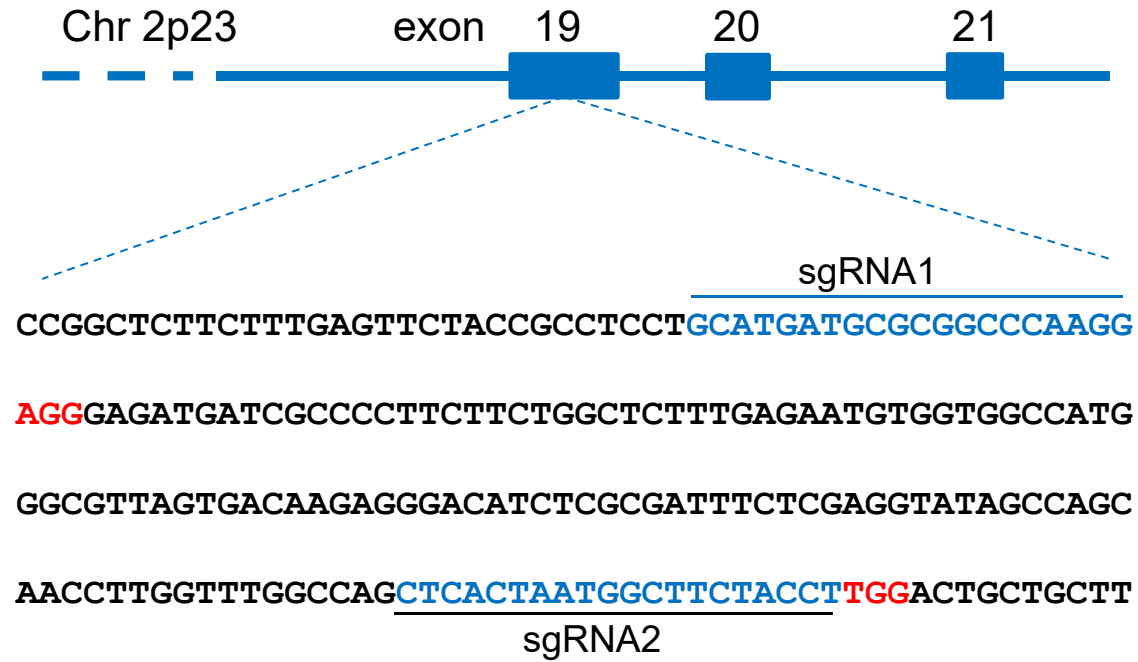

**Figure 2**

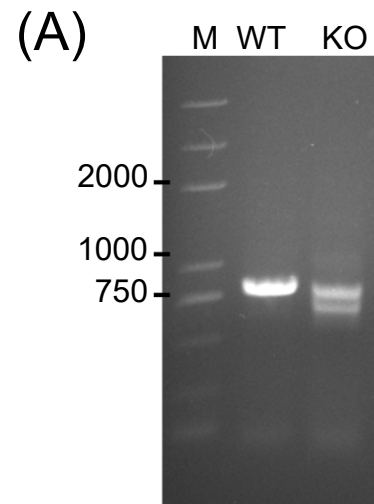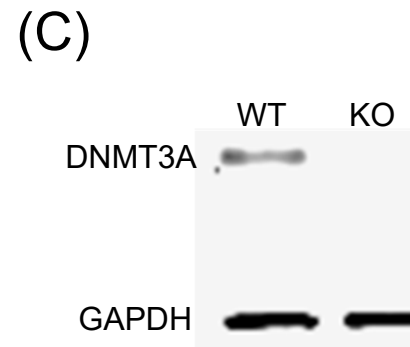

(B)

WT 5'-CCTGCATGATGCGCGGCCCAAGGAGG (114 bp) CTCACTAATGGCTTCTACCTTGGACA-3'

---

KO A CCTGCATGATGCGCGGCCCA-----CCTTGGACA  $\Delta$ 137 bp

KO B CCTGCATGAT-----AGGAGG (114 bp) CTCACTAATGGCTTCTACCTTGGACA  $\Delta$ 10 bp

Figure 3

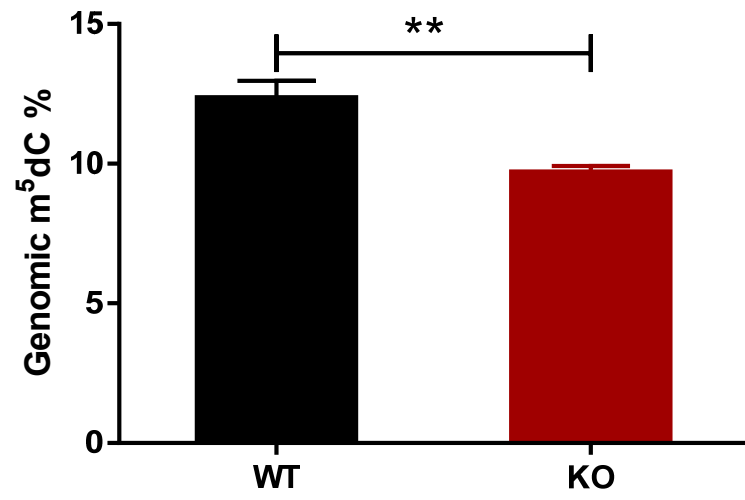

Figure 4

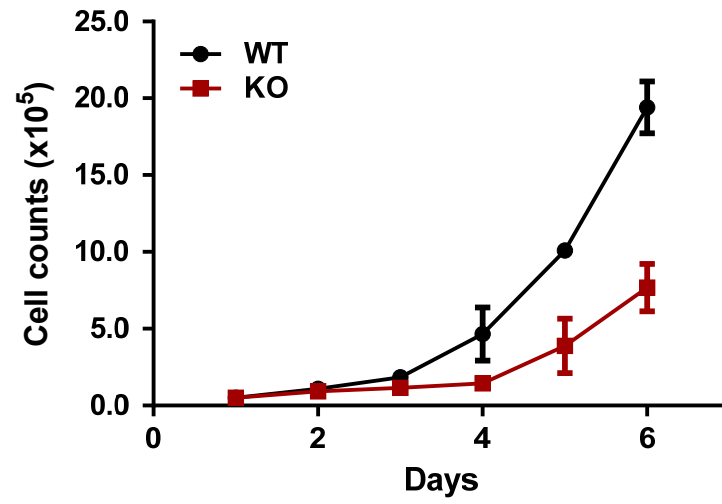

Figure 5

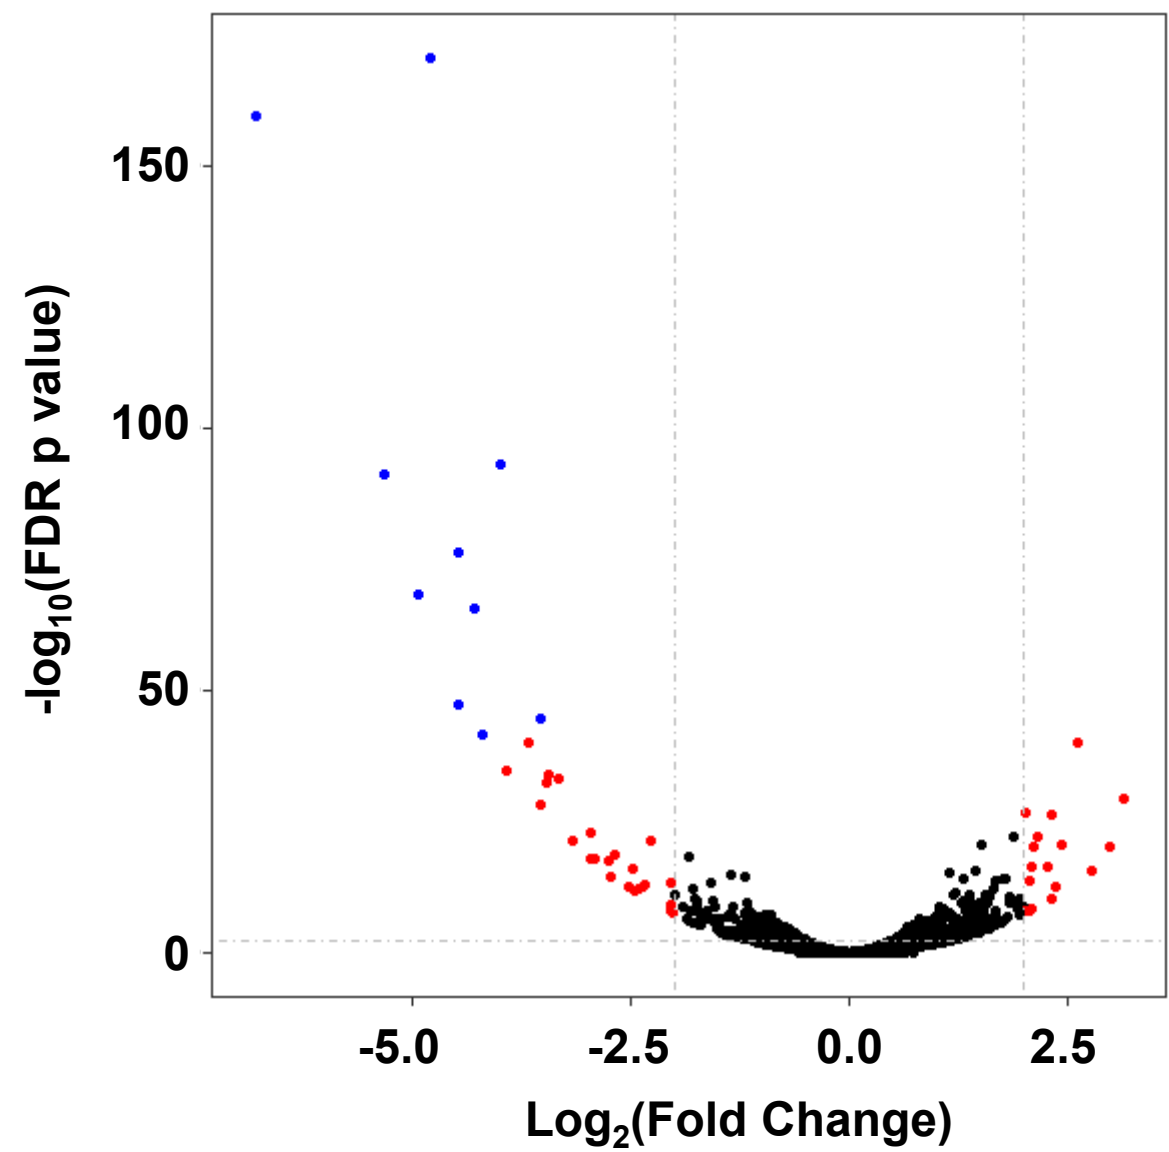



**Figure 6**

**(A)**

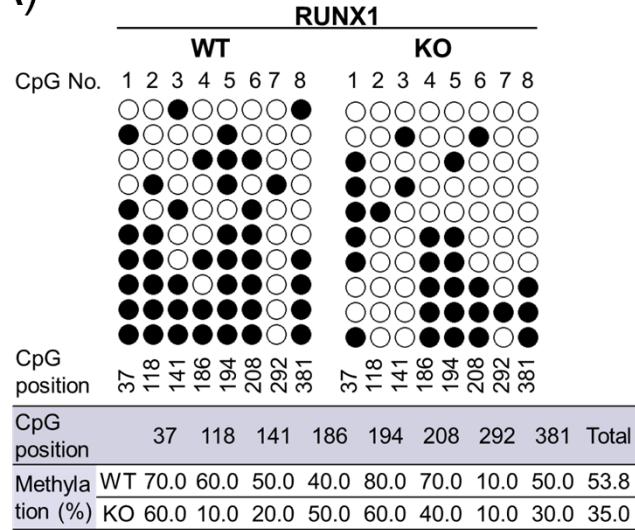

**(B)**

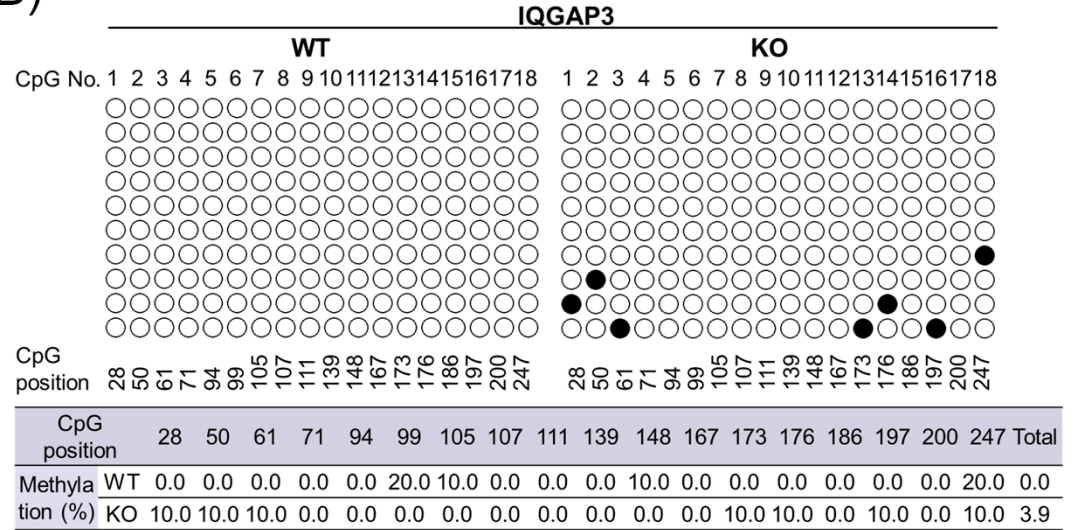

**(C)**

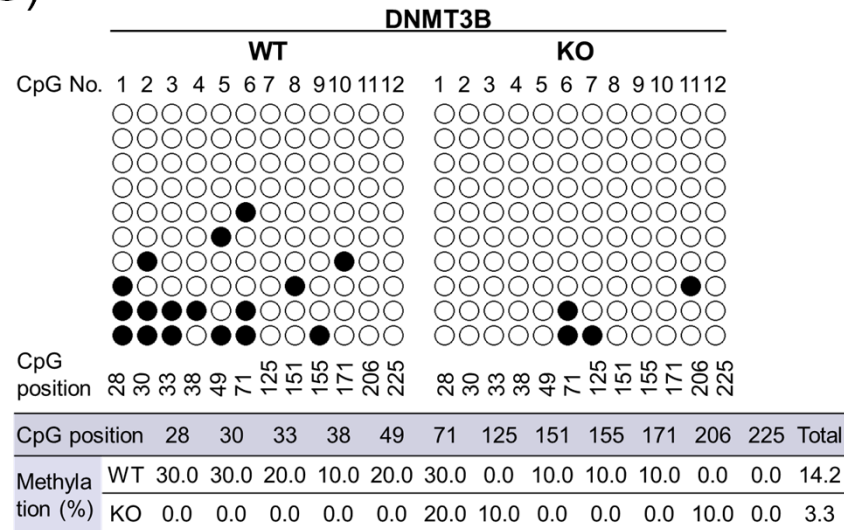

**(D)**

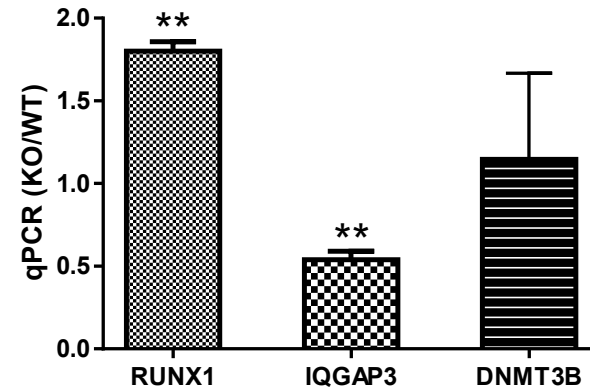

**Figure 7**

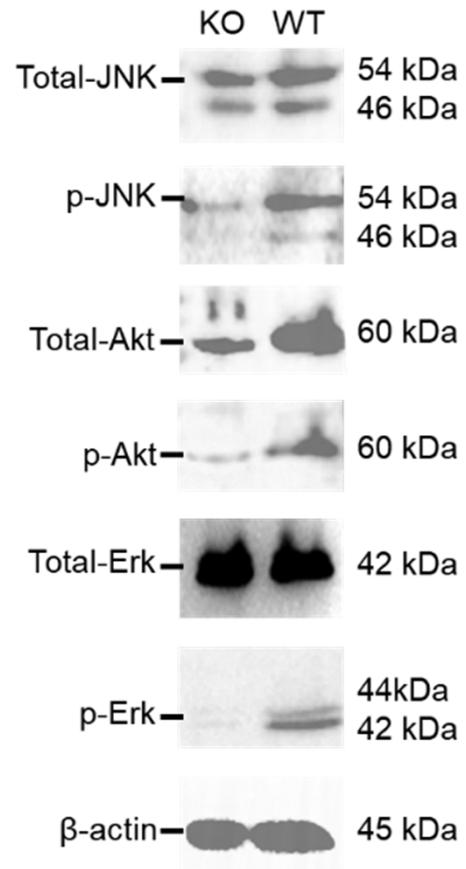

**Supplementary Materials:**

**Table S1** Promoter region sequences and CpG islands of representative genes for bisulfite DNA analysis.

| Gene       | CpG island Sequences                                                                                                                                                                                                                                                                                                                                                                                                                          | Product length | CpGs |
|------------|-----------------------------------------------------------------------------------------------------------------------------------------------------------------------------------------------------------------------------------------------------------------------------------------------------------------------------------------------------------------------------------------------------------------------------------------------|----------------|------|
| RUNX1      | tttcccaggctttaaatacctgtgagttgccagcccgtttaggggtcagacttcaccaaacaat<br>ttctttttattttttccctttatagttcacttatgcatgatagacgttaccaaggacttaactctcc<br>cggagctgatgcctagcattttaaataatgatgggatccacatcctgtcggagcagcggcttgatgcc<br>agcgttgaattactattgaataagcagcaatgaaatctttatcaaaaataatcagtagttccaaaaac<br>caciaataacaacaggagccgagttgtactaaatcagcaaagaccattgagatataataagtga<br>ctgagtcactttttctacatccccctcttgcaggctactcggctattttcttgacagcctggg<br>ggagggcaggt | 416 bp         | 8    |
| IQGAP3     | cagaaaaggagcctggaaggaacaagacgaggaactgctgtaaggggagcgggtactgcccc<br>ggcctggggcgctcttctcccagcacctgggcccggctccgcgccgggaactacaaatc<br>ccaggattctcagcgggtgtggacgggaagtgtcctgtctggcgggtccgacgggtagggggcg<br>gtggccaacggcgggagattcaacctggaagaaggaggaacatggagaggagagcagc<br>gggccaggctgggcagcctgtgagtg                                                                                                                                                 | 274 bp         | 18   |
| DNMT3<br>B | ccaaagcaggatgacaggcaggggcaccgcgcccccgggtggcactgctggctggaggtgg<br>gggttaaagcggagactctggtgctgtgtgactacagtgggggcctgcctctctgagcccc<br>gcctccaggcctgtgtgtgtctccgttcgggtgaaaggagcccgggaaaaaggccccaga<br>aggagtctggtttggacgtctgacccaccctcccgttagggcttctgatccccaggg                                                                                                                                                                                   | 250 bp         | 12   |

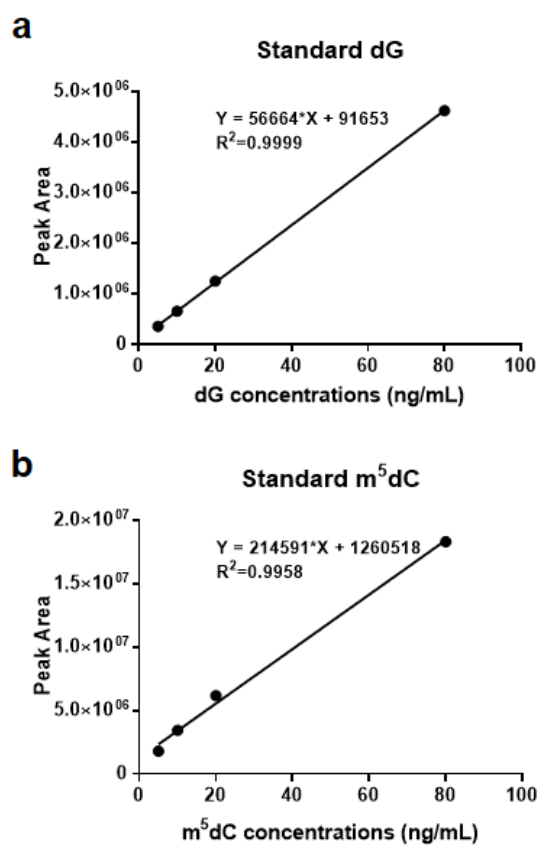

**Figure S1** Standard curves of dG and m<sup>5</sup>dC for determination of genomic DNA methylation using UPLC-MS.
